# Supplementary material for: Transcriptome analysis of the effect of Vibrio alginolyticus infection on the innate immunity-related complement pathway in Epinephelus coioides
Source: PubMed Central journal article supplement (PMC4407539; doi:10.1186/1471-2164-15-1102), 2014-12-13
Supplement: 12864_2014_6984_MOESM1_ESM.pdf [file 12864_2014_6984_MOESM1_ESM.pdf]

**Supplemental Table 1: Real-Time PCR primers used in this study**

| Genes                  | Predicted                       | Sequences                       | Species                      |
|------------------------|---------------------------------|---------------------------------|------------------------------|
| $\alpha$ V $\beta$ 3   | Integrin, alpha V               | F: GTTGGACCGTCTGAAGC            | <i>Danio rerio</i>           |
|                        |                                 | R: CCGAAACTCACGGTCATC           |                              |
| $\alpha$ V $\beta$ 3-2 | integrin beta-3-like            | F: GGAGTCCCAGAAGAATTGAAC        | <i>Oreochromis niloticus</i> |
|                        |                                 | R: AAGTACGGGTCTTCTCTTTG         |                              |
| $\alpha$ V $\beta$ 5   | protein HEG-like                | F: AGATTGTCCGTTCCGGTTAT         | <i>Oreochromis niloticus</i> |
|                        |                                 | R: TGTCCTTCTTGGAGCTCT           |                              |
| A2M                    | alpha-2-macroglobulin-like      | F : ATGAGGACAACCTGTGTTGA        | <i>Oreochromis niloticus</i> |
|                        |                                 | R : GAGGGACACATCCTTCG           |                              |
| $\beta$ -actin         | $\beta$ -actin                  | F : GAGAGGGAAATCGTGCG           | <i>Epinephelus coioides</i>  |
|                        |                                 | R : ACGGAACCTCTCATTGC           |                              |
| BF                     | complement factor B-like        | F : GTCAAGAGAAGAATATCTGGACATTTA | <i>Oreochromis niloticus</i> |
|                        |                                 | R : GACCACACAGACCCTTAAC         |                              |
| Calnexin               | calnexin-like                   | F: TGTGGAGAAGATTACAAACTGC       | <i>Oreochromis niloticus</i> |
|                        |                                 | R: GTTCACCACCAGTGTGTAGA         |                              |
| Cathepsin              | Cathepsin L precursor           | F: TGGAAGGTCCTACAACCTCTC        | <i>Anoplopoma fimbria</i>    |
|                        |                                 | R: GCGTCTGTACTCTTCGTTT          |                              |
| Collectins             | lactose-binding lectin I-2-like | F: GTCCGATGGGTCTAGAGT           | <i>Oreochromis niloticus</i> |
|                        |                                 | R: GGGATACACAAACAGAAGCG         |                              |
| C2r                    | C2r subcomponent-like           | F : GAACCGTCCGTCCAAAC           | <i>Danio rerio</i>           |
|                        |                                 | R : GGTCTGATTATCCTGGCAGAA       |                              |

|      |                                  |                                  |                               |
|------|----------------------------------|----------------------------------|-------------------------------|
| C1q  | Complement C1q-like protein 2    | F : ACTGATGCAGGATATATTGGAC       | <i>Salmo salar</i>            |
|      |                                  | R : ACACACAGTGAAGTGGAG           |                               |
| C1r  | complement C1r subcomponent-like | F : GGTTTAATATCACTCTCAACTTTAGCGA | <i>Oreochromis niloticus</i>  |
|      |                                  | R : AGCTATCAGACCTGGACT           |                               |
| C1s  | haptoglobin-like                 | F : GGCAGAAACCTGTTTGTCA          | <i>Oreochromis niloticus</i>  |
|      |                                  | R : GTAGTTCTGGAAGTGTGGATG        |                               |
| C3   | complement component C3          | F : CCTCAACAAGTTTGCTTCC          | <i>Epinephelus coioides</i>   |
|      |                                  | R : TTATAGTAGCCTGAGTTGATCCGTA    |                               |
| C4   | complement C4-like               | F : CTGATTCTATCACCACATGGG        | <i>Oreochromis niloticus</i>  |
|      |                                  | R : TAACAGGTGAAATGGATAGTTGC      |                               |
| C4BP | Beta-2-glycoprotein 1 precursor  | F : CCCTGACCCAGTGTCTAA           | <i>Anoplopoma fimbria</i>     |
|      |                                  | R : CACAGGACACAGGTATGC           |                               |
| C5   | complement C5                    | F : CTGGAGAAGAAGCTGCG            | <i>Oreochromis niloticus</i>  |
|      |                                  | R : AGCTGTGTTTGGACGA             |                               |
| C6   | complement component C6-like     | F : ACAATGATGATGACTACACTATAGG    | <i>Oreochromis niloticus</i>  |
|      |                                  | R : CAGTGTAGCACTGGAAGT           |                               |
| C6-d | spondin-2-like                   | F : GGCCAGACGAATACTGAG           | <i>Oreochromis niloticus</i>  |
|      |                                  | R : TGTCAGTTCCTGCGTCAT           |                               |
| C7   | complement component C7-like     | F : CGTTTCTTGAGGAGGAAAGT         | <i>Oreochromis niloticus</i>  |
|      |                                  | R : GAGGCCAGTTGTGCGTA            |                               |
| C8   | complement component C8 beta     | F : CCTTGCCACAGTCCTAT            | <i>Paralichthys olivaceus</i> |
|      |                                  | R : CGTAGTCGTCCAAAGTGTAAATC      |                               |

|           |                                                   |                            |                              |
|-----------|---------------------------------------------------|----------------------------|------------------------------|
| C8-d      | complement component C8 alpha chain-like          | F : ACTACCATACCTACCAGTTTG  | <i>Oreochromis niloticus</i> |
|           |                                                   | R : TCAGTCCCACCTCCACATAAT  |                              |
| C9        | complement component C9                           | F : AGGGAAATGCTGAAAGAGAT   | <i>Oreochromis niloticus</i> |
|           |                                                   | R : GTACTCTGAGACCTCACGA    |                              |
| DAF       | Decay accelerating factor                         | F : ATTGACATGGACAGAGGAAG   | <i>Danio rerio</i>           |
|           |                                                   | R : ATGGCTGTTTACCTGTGG     |                              |
| DCSIGN    | type II antifreeze protein I                      | F : GGTGTTTGGCTCTGGAA      | <i>Epinephelus bruneus</i>   |
|           |                                                   | R : TCTTGGCGCAGACAGAA      |                              |
| DCSIGN2   | nattectin                                         | F : GCCTTCATTTATTGCGG      | <i>Epinephelus bruneus</i>   |
|           |                                                   | R : TCCTTTGAAGCATGGTGGTA   |                              |
| Dynein    | cytoplasmic dynein 1 heavy chain 1-like isoform 2 | F : GACAGACCGCTGCTATC      | <i>Oreochromis niloticus</i> |
|           |                                                   | R : ATGGCCTGGAAGTCGAA      |                              |
| EEA1      | early endosome antigen 1                          | F : GGAGGATGAATCTGAACGC    | <i>Oreochromis niloticus</i> |
|           |                                                   | R : GCTTTGCTGCTGCAAAT      |                              |
| F-actin   | CDH1-D                                            | F : AGTCAAGTTTGATCGTCTTCTC | <i>Gallus gallus</i>         |
|           |                                                   | R : AGTAAGCGCGGGTCATA      |                              |
| F-actin-d | beta-centractin-like                              | F : CTGGTGTGTGTTGGACT      | <i>Oreochromis niloticus</i> |
|           |                                                   | R : TGTTGAAATTGTAGCCTTCCT  |                              |
| Hepcidin  | Hepcidin-like antimicrobial peptide precursor     | F : GCTCAGTGTTCAGTTG       | <i>Epinephelus coioides</i>  |
|           |                                                   | R : CTCGATATTAATGGCATCATCC |                              |
| HF        | complement regulatory plasma protein              | F : ATGGAATCCAGATCCACTTT   | <i>Paralabrax nebulifer</i>  |
|           |                                                   | R : TCTGTGTTTCCGTATTCCT    |                              |

|         |                                              |                                 |                              |
|---------|----------------------------------------------|---------------------------------|------------------------------|
| HSP70   | heat shock 70 kDa protein 14-like            | F : CCGAATTCAAACGCACC           | <i>Oreochromis niloticus</i> |
|         |                                              | R : TCTGGATATGTTGCATTCAAAGT     |                              |
| IF      | complement factor I-like                     | F : GGATGTGGTGAGGAGTTG          | <i>Oreochromis niloticus</i> |
|         |                                              | R : ACTCACACATTTGGTGGGTAA       |                              |
| li      | invariant chain-like protein                 | F : GAGCTTTGAGTCCTGGAT          | <i>Epinephelus akaara</i>    |
|         |                                              | R : GGCTTGTAGGAACCGAT           |                              |
| LAMP    | lysosomal membrane glycoprotein 2 precursor  | F : ATTCTTCCCTAAAGCATCAACAA     | <i>Salmo salar</i>           |
|         |                                              | R : GCCTGTATGAGCACGTTT          |                              |
| LAP2    | Liver-expressed antimicrobial peptide 2-like | F : AGGTCAATTCCTGCCTGTA         | <i>Oreochromis niloticus</i> |
|         |                                              | R : GCAGATATTCTTCCTGCAGTA       |                              |
| MASP1/2 | Mannan-binding lectin serine protease 1      | F : ACAAAGGACAAGAAGAGAAGG       | <i>Oreochromis niloticus</i> |
|         |                                              | R : GTTCTTTGTCATTTCCAGTTGAAATA  |                              |
| MHC I   | MHC class I alpha antigen                    | F : TTGAGATTGTAAAGCCACGC        | <i>Oreochromis niloticus</i> |
|         |                                              | R : CTTTGTGATTGTCCCCTTG         |                              |
| MHC II  | COP9 signalosome complex subunit 7a-like     | F : ACCTCTTGCCTATGGAAC          | <i>Oreochromis niloticus</i> |
|         |                                              | R : TGCTGGAGGAGCAGTGA           |                              |
| MPO-d   | eosinophil peroxidase-like                   | F : ACCACCAATGACGCTAAT          | <i>Oreochromis niloticus</i> |
|         |                                              | R : GTAGAGTCTCTCCATCCC          |                              |
| MR      | macrophage mannose receptor 1-like           | F : TCTCCAGCTCCTGATTG           | <i>Oreochromis niloticus</i> |
|         |                                              | R : CTCCATGCTGAGGATGGAAA        |                              |
| MR-d    | L-rhamnose-binding lectin CSL2-like          | F : CGTAAACCTTGTTTCGTAACCTCTAA  | <i>Oreochromis niloticus</i> |
|         |                                              | R : TACACAAAGATAACCTGTCCTACATCA |                              |

|          |                                                   |                              |                              |
|----------|---------------------------------------------------|------------------------------|------------------------------|
| NFY      | nuclear transcription factor Y subunit alpha-like | F: TGCCAACACCAACTACAAA       | <i>Oreochromis niloticus</i> |
|          |                                                   | R: TCCTCCTCCAGCATCTCA        |                              |
| Piscidin | Piscidin-like antimicrobial peptide precursor     | F: CTCTTTCTTGTGTTGTGCGC      | <i>Epinephelus coioides</i>  |
|          |                                                   | R: GTCCAGCTCTTCCATGC         |                              |
| PLG      | plasminogen                                       | F : CATGGACCTGTGCAAATA       | <i>Perca flavescens</i>      |
|          |                                                   | R : CATGTTTTGCCAGATTCAGTTAC  |                              |
| SERPING1 | minus strand C1 inhibitor                         | F : CCCTCATAATATGAATCTGAGCG  | <i>Larimichthys crocea</i>   |
|          |                                                   | R : AAATGTTGGATCTTATTGTTGGTC |                              |
| TAPBP    | tapasin-like                                      | F: AACAGCCGCTTAGGACA         | <i>Oreochromis niloticus</i> |
|          |                                                   | R: TTTATATCCAGGCTGACGGAGA    |                              |
| TfR      | Transferrin receptor 1a                           | F: GATGTTATCACCGTGGAAGTC     | <i>Danio rerio</i>           |
|          |                                                   | R: CAACTGTTCGATGTGGCAA       |                              |
| TUBB     | Tubulin, beta 5                                   | F: CTGCTCATCAGCAAGATCC       | <i>Danio rerio</i>           |
|          |                                                   | R: CCTCATTGTCAATACAGTAGGTTT  |                              |

**Supplemental Table 2: Gene ontology analysis of *Epinephelus coioides* larvae**

| Gene Ontology term                            | Cluster frequency            | Genome frequency of use        | Corrected P-value |
|-----------------------------------------------|------------------------------|--------------------------------|-------------------|
| <b>Cellular component</b>                     |                              |                                |                   |
| myosin complex                                | 45 out of 1129 genes, 4.0%   | 162 out of 28794 genes, 0.6%   | 1.46E-23          |
| actin cytoskeleton                            | 79 out of 1129 genes, 7.0%   | 656 out of 28794 genes, 2.3%   | 1.62E-16          |
| contractile fiber                             | 59 out of 1129 genes, 5.2%   | 501 out of 28794 genes, 1.7%   | 1.28E-11          |
| extracellular region                          | 106 out of 1129 genes, 9.4%  | 1483 out of 28794 genes, 5.2%  | 3.55E-07          |
| myofibril                                     | 43 out of 1129 genes, 3.8%   | 433 out of 28794 genes, 1.5%   | 6.02E-06          |
| sarcomere                                     | 36 out of 1129 genes, 3.2%   | 327 out of 28794 genes, 1.1%   | 6.05E-06          |
| contractile fiber part                        | 36 out of 1129 genes, 3.2%   | 332 out of 28794 genes, 1.2%   | 8.94E-06          |
| cytoskeleton                                  | 173 out of 1129 genes, 15.3% | 3012 out of 28794 genes, 10.5% | 3.39E-05          |
| extracellular region part                     | 92 out of 1129 genes, 8.1%   | 1346 out of 28794 genes, 4.7%  | 3.53E-05          |
| striated muscle thin filament                 | 9 out of 1129 genes, 0.8%    | 25 out of 28794 genes, 0.1%    | 5.28E-05          |
| cytoskeletal part                             | 108 out of 1129 genes, 9.6%  | 1724 out of 28794 genes, 6.0%  | 0.00021           |
| non-membrane-bounded organelle                | 237 out of 1129 genes, 21.0% | 4673 out of 28794 genes, 16.2% | 0.00230           |
| <b>Molecular function</b>                     |                              |                                |                   |
| hydrolase activity                            | 283 out of 1138 genes, 24.9% | 5158 out of 28380 genes, 18.2% | 2.08E-06          |
| cytoskeletal protein binding                  | 101 out of 1138 genes, 8.9%  | 1398 out of 28380 genes, 4.9%  | 2.80E-06          |
| hydrolase activity, acting on acid anhydrides | 132 out of 1138 genes, 11.6% | 2114 out of 28380 genes, 7.4%  | 8.62E-05          |

|                                                                                    |                              |                                |          |
|------------------------------------------------------------------------------------|------------------------------|--------------------------------|----------|
| pyrophosphatase activity                                                           | 131 out of 1138 genes, 11.5% | 2097 out of 28380 genes, 7.4%  | 9.39E-05 |
| hydrolase activity, acting on acid anhydrides, in phosphorus-containing anhydrides | 131 out of 1138 genes, 11.5% | 2103 out of 28380 genes, 7.4%  | 0.00010  |
| structural molecule activity                                                       | 52 out of 1138 genes, 4.6%   | 613 out of 28380 genes, 2.2%   | 0.00013  |
| nucleoside-triphosphatase activity                                                 | 124 out of 1138 genes, 10.9% | 1977 out of 28380 genes, 7.0%  | 0.00016  |
| endopeptidase activity                                                             | 44 out of 1138 genes, 3.9%   | 501 out of 28380 genes, 1.8%   | 0.00042  |
| active transmembrane transporter activity                                          | 72 out of 1138 genes, 6.3%   | 1007 out of 28380 genes, 3.5%  | 0.00063  |
| phosphorylase activity                                                             | 5 out of 1138 genes, 0.4%    | 11 out of 28380 genes, 0.0%    | 0.01458  |
| peptidase activity                                                                 | 66 out of 1138 genes, 5.8%   | 989 out of 28380 genes, 3.5%   | 0.01501  |
| peptidase activity, acting on L-amino acid peptides                                | 62 out of 1138 genes, 5.4%   | 912 out of 28380 genes, 3.2%   | 0.01503  |
| transporter activity                                                               | 155 out of 1138 genes, 13.6% | 2861 out of 28380 genes, 10.1% | 0.02337  |
| oligopeptide transporter activity                                                  | 4 out of 1138 genes, 0.4%    | 7 out of 28380 genes, 0.0%     | 0.03071  |
| potassium-transporting ATPase activity                                             | 8 out of 1138 genes, 0.7%    | 38 out of 28380 genes, 0.1%    | 0.04100  |
| potassium ion transmembrane transporter activity                                   | 8 out of 1138 genes, 0.7%    | 38 out of 28380 genes, 0.1%    | 0.04100  |
| <b>Biological process</b>                                                          |                              |                                |          |
| glucose metabolic process                                                          | 42 out of 1105 genes, 3.8%   | 279 out of 27537 genes, 1.0%   | 2.39E-10 |
| hexose metabolic process                                                           | 48 out of 1105 genes, 4.3%   | 443 out of 27537 genes, 1.6%   | 7.72E-07 |
| muscle system process                                                              | 52 out of 1105 genes, 4.7%   | 520 out of 27537 genes, 1.9%   | 2.54E-06 |

|                                                                          |                              |                                |          |
|--------------------------------------------------------------------------|------------------------------|--------------------------------|----------|
| small molecule metabolic process                                         | 215 out of 1105 genes, 19.5% | 3657 out of 27537 genes, 13.3% | 4.39E-06 |
| protein activation cascade                                               | 11 out of 1105 genes, 1.0%   | 31 out of 27537 genes, 0.1%    | 2.49E-05 |
| monosaccharide metabolic process                                         | 48 out of 1105 genes, 4.3%   | 493 out of 27537 genes, 1.8%   | 2.50E-05 |
| muscle contraction                                                       | 37 out of 1105 genes, 3.3%   | 328 out of 27537 genes, 1.2%   | 2.55E-05 |
| complement activation                                                    | 9 out of 1105 genes, 0.8%    | 20 out of 27537 genes, 0.1%    | 4.39E-05 |
| alcohol metabolic process                                                | 69 out of 1105 genes, 6.2%   | 854 out of 27537 genes, 3.1%   | 4.72E-05 |
| regulation of muscle contraction                                         | 17 out of 1105 genes, 1.5%   | 89 out of 27537 genes, 0.3%    | 0.00011  |
| glucose catabolic process                                                | 21 out of 1105 genes, 1.9%   | 138 out of 27537 genes, 0.5%   | 0.00022  |
| small molecule biosynthetic process                                      | 56 out of 1105 genes, 5.1%   | 665 out of 27537 genes, 2.4%   | 0.00025  |
| regulation of muscle system process                                      | 19 out of 1105 genes, 1.7%   | 116 out of 27537 genes, 0.4%   | 0.00027  |
| skeletal muscle contraction                                              | 13 out of 1105 genes, 1.2%   | 55 out of 27537 genes, 0.2%    | 0.00029  |
| hexose catabolic process                                                 | 21 out of 1105 genes, 1.9%   | 141 out of 27537 genes, 0.5%   | 0.00033  |
| alcohol catabolic process                                                | 21 out of 1105 genes, 1.9%   | 141 out of 27537 genes, 0.5%   | 0.00033  |
| monosaccharide catabolic process                                         | 21 out of 1105 genes, 1.9%   | 141 out of 27537 genes, 0.5%   | 0.00033  |
| nucleobase, nucleoside and nucleotide biosynthetic process               | 45 out of 1105 genes, 4.1%   | 491 out of 27537 genes, 1.8%   | 0.0004   |
| nucleobase, nucleoside, nucleotide and nucleic acid biosynthetic process | 45 out of 1105 genes, 4.1%   | 491 out of 27537 genes, 1.8%   | 0.0004   |
| humoral immune response                                                  | 10 out of 1105 genes, 0.9%   | 32 out of 27537 genes, 0.1%    | 0.00044  |
| purine nucleoside triphosphate biosynthetic process                      | 27 out of 1105 genes, 2.4%   | 223 out of 27537 genes, 0.8%   | 0.00052  |



|                                                         |                            |                              |         |
|---------------------------------------------------------|----------------------------|------------------------------|---------|
| purine ribonucleotide biosynthetic process              | 29 out of 1105 genes, 2.6% | 251 out of 27537 genes, 0.9% | 0.00053 |
| striated muscle contraction                             | 18 out of 1105 genes, 1.6% | 111 out of 27537 genes, 0.4% | 0.00066 |
| cellular carbohydrate catabolic process                 | 21 out of 1105 genes, 1.9% | 151 out of 27537 genes, 0.5% | 0.00106 |
| nucleotide biosynthetic process                         | 42 out of 1105 genes, 3.8% | 465 out of 27537 genes, 1.7% | 0.00146 |
| purine ribonucleoside triphosphate biosynthetic process | 26 out of 1105 genes, 2.4% | 221 out of 27537 genes, 0.8% | 0.00149 |
| carbohydrate catabolic process                          | 22 out of 1105 genes, 2.0% | 168 out of 27537 genes, 0.6% | 0.00166 |
| nucleoside triphosphate biosynthetic process            | 27 out of 1105 genes, 2.4% | 237 out of 27537 genes, 0.9% | 0.00175 |
| voluntary skeletal muscle contraction                   | 11 out of 1105 genes, 1.0% | 45 out of 27537 genes, 0.2%  | 0.00178 |
| twitch skeletal muscle contraction                      | 11 out of 1105 genes, 1.0% | 45 out of 27537 genes, 0.2%  | 0.00178 |
| ribonucleotide biosynthetic process                     | 29 out of 1105 genes, 2.6% | 271 out of 27537 genes, 1.0% | 0.00259 |
| purine nucleotide biosynthetic process                  | 37 out of 1105 genes, 3.3% | 398 out of 27537 genes, 1.4% | 0.00325 |
| musculoskeletal movement                                | 14 out of 1105 genes, 1.3% | 78 out of 27537 genes, 0.3%  | 0.00359 |
| multicellular organismal movement                       | 15 out of 1105 genes, 1.4% | 89 out of 27537 genes, 0.3%  | 0.00361 |
| cellular nitrogen compound biosynthetic process         | 52 out of 1105 genes, 4.7% | 655 out of 27537 genes, 2.4% | 0.00396 |
| ribonucleoside triphosphate biosynthetic process        | 26 out of 1105 genes, 2.4% | 233 out of 27537 genes, 0.8% | 0.00404 |
| fast-twitch skeletal muscle fiber                       | 7 out of 1105 genes, 0.6%  | 18 out of 27537 genes, 0.1%  | 0.0053  |

|                                           |                              |                               |         |
|-------------------------------------------|------------------------------|-------------------------------|---------|
| contraction                               |                              |                               |         |
| system process                            | 146 out of 1105 genes, 13.2% | 2523 out of 27537 genes, 9.2% | 0.00577 |
| cellular carbohydrate metabolic process   | 58 out of 1105 genes, 5.2%   | 772 out of 27537 genes, 2.8%  | 0.00596 |
| cardiac muscle tissue morphogenesis       | 14 out of 1105 genes, 1.3%   | 84 out of 27537 genes, 0.3%   | 0.00891 |
| regulation of striated muscle contraction | 9 out of 1105 genes, 0.8%    | 35 out of 27537 genes, 0.1%   | 0.01073 |
| immune effector process                   | 22 out of 1105 genes, 2.0%   | 204 out of 27537 genes, 0.7%  | 0.03947 |

**Supplemental Table 3: KEGG pathway enrichment analysis of *Epinephelus coioides* larvae**

| List | Pathway                                     | NGS with pathway annotation (1504) | All genes with pathway annotation (32664) | P value     | Q value  | Pathway ID |
|------|---------------------------------------------|------------------------------------|-------------------------------------------|-------------|----------|------------|
|      | <b>Metabolism</b>                           |                                    |                                           |             |          |            |
|      | <b>Carbohydrate metabolism</b>              |                                    |                                           |             |          |            |
| 12   | Glycolysis / Gluconeogenesis                | 25 (1.66%)                         | 173 (0.53%)                               | 4.10E-07    | 7.42E-06 | ko00010    |
| 18   | Starch and sucrose metabolism               | 21 (1.4%)                          | 167 (0.51%)                               | 2.98E-05    | 3.59E-04 | ko00500    |
| 27   | Fructose and mannose metabolism             | 16 (1.06%)                         | 152 (0.47%)                               | 0.001784423 | 1.43E-02 | ko00051    |
| 35   | Pentose phosphate pathway                   | 10 (0.66%)                         | 85 (0.26%)                                | 0.005645537 | 3.45E-02 | ko00030    |
| 37   | Galactose metabolism                        | 14 (0.93%)                         | 146 (0.45%)                               | 0.007629812 | 4.47E-02 | ko00052    |
| 43   | Amino sugar and nucleotide sugar metabolism | 14 (0.93%)                         | 171 (0.52%)                               | 0.02701486  | 1.36E-01 | ko00520    |
| 48   | Pyruvate metabolism                         | 9 (0.6%)                           | 101 (0.31%)                               | 0.04333364  | 1.93E-01 | ko00620    |
|      | <b>Amino acid metabolism</b>                |                                    |                                           |             |          |            |
| 26   | Cysteine and methionine metabolism          | 14 (0.93%)                         | 117 (0.36%)                               | 0.000991208 | 8.27E-03 | ko00270    |
| 33   | Glycine, serine and threonine metabolism    | 10 (0.66%)                         | 84 (0.26%)                                | 0.005190363 | 3.41E-02 | ko00260    |
|      | <b>Metabolism of other amino acids</b>      |                                    |                                           |             |          |            |
| 38   | Glutathione metabolism                      | 11 (0.73%)                         | 114 (0.35%)                               | 0.01613945  | 9.22E-02 | ko00480    |
|      | <b>Metabolism of cofactors and vitamins</b> |                                    |                                           |             |          |            |
| 47   | Retinol metabolism                          | 12 (0.8%)                          | 149 (0.46%)                               | 0.04291683  | 1.93E-01 | ko00830    |

|    |                                       |             |              |             |          |         |
|----|---------------------------------------|-------------|--------------|-------------|----------|---------|
|    | <b>Genetic Information Processing</b> |             |              |             |          |         |
|    | <b>Translation</b>                    |             |              |             |          |         |
| 23 | Aminoacyl-tRNA biosynthesis           | 16 (1.06%)  | 136 (0.42%)  | 0.000540022 | 5.09E-03 | ko00970 |
|    | <b>Cellular Processes</b>             |             |              |             |          |         |
|    | <b>Cell communication</b>             |             |              |             |          |         |
| 9  | Tight junction                        | 112 (7.45%) | 1224 (3.75%) | 3.60E-12    | 8.68E-11 | ko04530 |
|    | <b>Transport and catabolism</b>       |             |              |             |          |         |
| 15 | Phagosome                             | 55 (3.66%)  | 651 (1.99%)  | 1.27E-05    | 1.84E-04 | ko04145 |
|    | <b>Cell motility</b>                  |             |              |             |          |         |
| 16 | Regulation of actin cytoskeleton      | 98 (6.52%)  | 1387 (4.25%) | 1.81E-05    | 2.45E-04 | ko04810 |
|    | <b>Organismal Systems</b>             |             |              |             |          |         |
|    | <b>Circulatory system</b>             |             |              |             |          |         |
| 1  | Cardiac muscle contraction            | 108 (7.18%) | 742 (2.27%)  | 1.81E-26    | 3.94E-24 | ko04260 |
| 11 | Vascular smooth muscle contraction    | 88 (5.85%)  | 988 (3.02%)  | 2.97E-09    | 5.86E-08 | ko04270 |
|    | <b>Digestive system</b>               |             |              |             |          |         |
| 2  | Protein digestion and absorption      | 91 (6.05%)  | 575 (1.76%)  | 4.50E-25    | 4.88E-23 | ko04974 |
| 10 | Pancreatic secretion                  | 70 (4.65%)  | 618 (1.89%)  | 4.61E-12    | 1.00E-10 | ko04972 |
| 21 | Vitamin digestion and absorption      | 17 (1.13%)  | 146 (0.45%)  | 0.000415018 | 4.29E-03 | ko04977 |
| 24 | Mineral absorption                    | 24 (1.6%)   | 253 (0.77%)  | 0.000694997 | 6.28E-03 | ko04978 |
| 28 | Salivary secretion                    | 39 (2.59%)  | 517 (1.58%)  | 0.001889861 | 1.46E-02 | ko04970 |
| 29 | Carbohydrate digestion and absorption | 26 (1.73%)  | 316 (0.97%)  | 0.003268099 | 2.45E-02 | ko04973 |

|    |                                                        |             |              |             |          |         |
|----|--------------------------------------------------------|-------------|--------------|-------------|----------|---------|
| 32 | Fat digestion and absorption                           | 15 (1%)     | 153 (0.47%)  | 0.004800051 | 3.26E-02 | ko04975 |
| 45 | Bile secretion                                         | 27 (1.8%)   | 403 (1.23%)  | 0.03405557  | 1.64E-01 | ko04976 |
|    | <b>Immune system</b>                                   |             |              |             |          |         |
| 5  | Complement and coagulation cascades                    | 60 (3.99%)  | 341 (1.04%)  | 3.13E-19    | 1.36E-17 | ko04610 |
| 17 | Antigen processing and presentation                    | 20 (1.33%)  | 152 (0.47%)  | 2.36E-05    | 3.01E-04 | ko04612 |
| 30 | Hematopoietic cell lineage                             | 21 (1.4%)   | 238 (0.73%)  | 0.003475879 | 2.51E-02 | ko04640 |
|    | <b>Excretory system</b>                                |             |              |             |          |         |
| 19 | Proximal tubule bicarbonate reclamation                | 17 (1.13%)  | 132 (0.4%)   | 0.00012283  | 1.40E-03 | ko04964 |
| 46 | Aldosterone-regulated sodium reabsorption              | 17 (1.13%)  | 228 (0.7%)   | 0.03537639  | 1.67E-01 | ko04960 |
|    | <b>Endocrine system</b>                                |             |              |             |          |         |
| 31 | Renin-angiotensin system                               | 7 (0.47%)   | 45 (0.14%)   | 0.004232833 | 2.96E-02 | ko04614 |
| 41 | PPAR signaling pathway                                 | 22 (1.46%)  | 301 (0.92%)  | 0.02281113  | 1.21E-01 | ko03320 |
|    | <b>Sensory system</b>                                  |             |              |             |          |         |
| 49 | Olfactory transduction                                 | 17 (1.13%)  | 234 (0.72%)  | 0.04347116  | 1.93E-01 | ko04740 |
|    | <b>Human Diseases</b>                                  |             |              |             |          |         |
|    | <b>Cardiovascular diseases</b>                         |             |              |             |          |         |
| 3  | Viral myocarditis                                      | 86 (5.72%)  | 604 (1.85%)  | 1.19E-20    | 7.37E-19 | ko05416 |
| 4  | Hypertrophic cardiomyopathy (HCM)                      | 124 (8.24%) | 1091 (3.34%) | 1.36E-20    | 7.37E-19 | ko05410 |
| 7  | Dilated cardiomyopathy                                 | 123 (8.18%) | 1172 (3.59%) | 1.19E-17    | 3.70E-16 | ko05414 |
| 36 | Arrhythmogenic right ventricular cardiomyopathy (ARVC) | 39 (2.59%)  | 552 (1.69%)  | 0.005718025 | 3.45E-02 | ko05412 |

|    |                                         |            |             |             |          |         |
|----|-----------------------------------------|------------|-------------|-------------|----------|---------|
|    | <b>Infectious diseases: Bacterial</b>   |            |             |             |          |         |
| 6  | Staphylococcus aureus infection         | 44 (2.93%) | 206 (0.63%) | 1.00E-17    | 3.62E-16 | ko05150 |
| 40 | Pathogenic Escherichia coli infection   | 31 (2.06%) | 457 (1.4%)  | 0.02117175  | 1.15E-01 | ko05130 |
|    | <b>Immune diseases</b>                  |            |             |             |          |         |
| 8  | Systemic lupus erythematosus            | 42 (2.79%) | 248 (0.76%) | 2.68E-13    | 7.28E-12 | ko05322 |
| 14 | Autoimmune thyroid disease              | 14 (0.93%) | 72 (0.22%)  | 4.41E-06    | 6.84E-05 | ko05320 |
| 20 | Graft-versus-host disease               | 10 (0.66%) | 57 (0.17%)  | 0.000248344 | 2.69E-03 | ko05332 |
| 25 | Allograft rejection                     | 10 (0.66%) | 66 (0.2%)   | 0.000834373 | 7.24E-03 | ko05330 |
| 34 | Asthma                                  | 6 (0.4%)   | 36 (0.11%)  | 0.005607425 | 3.45E-02 | ko05310 |
|    | <b>Neurodegenerative diseases</b>       |            |             |             |          |         |
| 13 | Prion diseases                          | 28 (1.86%) | 225 (0.69%) | 1.88E-06    | 3.14E-05 | ko05020 |
|    | <b>Endocrine and metabolic diseases</b> |            |             |             |          |         |
| 22 | Type I diabetes mellitus                | 12 (0.8%)  | 85 (0.26%)  | 0.000508753 | 5.02E-03 | ko04940 |
| 44 | Type II diabetes mellitus               | 21 (1.4%)  | 293 (0.9%)  | 0.03085919  | 1.52E-01 | ko04930 |
|    | <b>Infectious diseases: Parasitic</b>   |            |             |             |          |         |
| 39 | Amoebiasis                              | 39 (2.59%) | 593 (1.82%) | 0.01701984  | 9.47E-02 | ko05146 |
| 42 | Leishmaniasis                           | 20 (1.33%) | 269 (0.82%) | 0.02469462  | 1.28E-01 | ko05140 |

**Supplemental Table 4: Summary of the variations in complement-related gene expression between controls and grouper challenged with *Vibrio alginolyticus***

| Unigene | PREDICTED                        | 1h | 2h    | 3h    | 4h    | 5h    | 6h    | 7h   | 8h    | 12h  | 16h | 24h  | 48h |
|---------|----------------------------------|----|-------|-------|-------|-------|-------|------|-------|------|-----|------|-----|
| A2M     | Alpha-2-macroglobulin-like       |    |       |       |       |       |       |      |       |      |     |      |     |
| BF      | Complement factor B-like         |    |       | 4.58  | 5.43  | 10.90 | 5.24  | 4.22 | 4.73  | 5.07 |     |      |     |
| C2r     | C2r subcomponent-like            |    | -2.22 | -2.46 |       |       |       |      |       |      |     |      |     |
| C1q     | Complement C1q-like protein 2    |    |       |       |       |       |       |      | 2.74  |      |     |      |     |
| C1r     | Complement C1r subcomponent-like |    |       |       | 2.39  |       |       |      |       |      |     |      |     |
| C1s     | Haptoglobin-like                 |    |       |       | 84.40 | 37.27 | 16.98 | 5.00 | 10.07 |      |     |      |     |
| C3      | Complement component C3          |    |       |       | 3.21  | 4.40  | 3.74  | 2.23 | 3.21  |      |     |      |     |
| C4      | Complement C4-like               |    |       |       | 2.13  | 4.01  |       | 2.45 | 3.60  |      |     | 4.11 |     |

|      |                                          |      |  |  |       |       |       |       |       |       |       |       |  |
|------|------------------------------------------|------|--|--|-------|-------|-------|-------|-------|-------|-------|-------|--|
| C4BP | Beta-2-glycoprotein 1 precursor          |      |  |  |       | 2.69  |       |       | 1.94  | 8.20  |       | 6.63  |  |
| C5   | Complement C5                            |      |  |  |       |       |       |       | 3.79  | 3.92  | 2.93  | 8.55  |  |
| C6   | Complement component C6-like             |      |  |  | 10.90 | 16.08 | 19.77 | 22.38 | 14.82 | 23.19 | 9.81  | 16.39 |  |
| C6-d | Spondin-2-like                           | 1.50 |  |  |       | -2.95 | -2.65 | -6.95 |       |       |       |       |  |
| C7   | Complement component C7-like             |      |  |  | 16.45 | 30.06 | 20.44 | 28.00 | 22.57 | 19.81 | 12.92 |       |  |
| C8   | Complement component C8 beta             |      |  |  |       | 3.45  |       |       | 2.23  | 9.40  | 5.19  | 9.37  |  |
| C8-d | Complement component C8 alpha chain-like |      |  |  | 2.48  | 3.48  | 2.55  | 3.86  | 4.05  | 6.83  | 2.74  | 9.04  |  |
| C9   | Complement component C9                  |      |  |  | 6.50  | 5.65  | 2.96  | 4.20  | 3.81  | 5.26  | 2.61  | 5.12  |  |
| DAF  | Decay accelerating factor                |      |  |  |       |       |       |       |       |       |       |       |  |



|          |                                                        |      |       |       |       |       |      |       |      |      |      |  |  |
|----------|--------------------------------------------------------|------|-------|-------|-------|-------|------|-------|------|------|------|--|--|
| MASP1/2  | Mannan-binding lectin<br>serine protease 1             |      | -1.81 | -2.12 | -1.84 |       |      |       |      |      |      |  |  |
| HF       | Complement regulatory<br>plasma protein                |      |       |       |       | 7.41  | 4.84 | 3.63  | 8.24 |      |      |  |  |
| IF       | Complement factor I-like                               |      | 11.83 | 11.23 | 16.61 | 16.71 | 7.55 | 5.13  | 4.47 | 7.20 | 2.36 |  |  |
| PLG      | Ca <sup>2+</sup> -dependent complex<br>C1R/C1S subunit | 3.39 |       |       |       |       |      | -3.12 |      |      |      |  |  |
| SERPING1 | Minus strand C1 inhibitor                              |      |       |       |       |       |      |       |      |      |      |  |  |

**Supplemental Table 5: Summary of the variations in phagocytosis-related gene expression between controls and grouper challenged with *Vibrio alginolyticus***

| Unigene             | PREDICTED                                         | 1h | 2h | 3h | 4h | 5h   | 6h    | 7h   | 8h | 12h | 16h | 24h  | 48h  |
|---------------------|---------------------------------------------------|----|----|----|----|------|-------|------|----|-----|-----|------|------|
| $\alpha V\beta 3$   | Integrin, alpha V                                 |    |    |    |    |      |       |      |    |     |     |      |      |
| $\alpha V\beta 3-2$ | Integrin beta-3-like                              |    |    |    |    |      |       |      |    |     |     |      |      |
| $\alpha V\beta 5$   | Protein HEG-like                                  |    |    |    |    | 2.57 |       |      |    |     |     |      |      |
| Calnexin            | Calnexin-like                                     |    |    |    |    |      |       | 1.83 |    |     |     |      |      |
| Cathepsin           | Cathepsin L precursor                             |    |    |    |    | 3.95 | 2.93  | 89.3 |    |     |     |      |      |
| Collectins          | Lactose-binding lectin I-2-like                   |    |    |    |    |      | 20.48 |      |    |     |     |      |      |
| DCSIGN              | Type II antifreeze protein I                      |    |    |    |    |      |       |      |    |     |     | 4.85 | 1.65 |
| DCSIGN2             | Nattectin                                         |    |    |    |    |      |       |      |    |     |     |      |      |
| Dynein              | Cytoplasmic dynein 1 heavy chain 1-like isoform 2 |    |    |    |    |      |       |      |    |     |     |      |      |

|           |                                             |  |  |         |  |      |  |      |      |      |       |      |  |
|-----------|---------------------------------------------|--|--|---------|--|------|--|------|------|------|-------|------|--|
| EEA1      | Early endosome antigen 1                    |  |  |         |  |      |  |      |      |      | 2.07  | 3.48 |  |
| F-actin   | CDH1-D                                      |  |  |         |  |      |  |      |      | 1.37 |       |      |  |
| F-actin-d | Beta-centractin-like                        |  |  |         |  |      |  |      |      |      |       |      |  |
| HSP70     | Heat shock 70 kDa protein 14-like           |  |  |         |  | 1.81 |  |      |      |      |       |      |  |
| li-d      | Invariant chain-like protein                |  |  | 1.71    |  |      |  |      |      |      |       |      |  |
| LAMP      | Lysosomal membrane glycoprotein 2 precursor |  |  |         |  |      |  | 2.05 | 2.54 |      |       |      |  |
| MHCI      | Beta-centractin-like                        |  |  | 1146.74 |  |      |  |      |      |      |       |      |  |
| MHCII     | COP9 signalosome complex subunit 7a-like    |  |  |         |  |      |  |      |      |      |       |      |  |
| MPO-d     | Eosinophil peroxidase-like                  |  |  |         |  |      |  |      |      |      | -4.23 |      |  |

|       |                                                         |  |  |  |      |      |      |       |       |  |       |  |  |
|-------|---------------------------------------------------------|--|--|--|------|------|------|-------|-------|--|-------|--|--|
| MR    | Macrophage<br>mannose receptor<br>1-like                |  |  |  |      | 7.95 | 2.53 | 26.32 | 13.92 |  |       |  |  |
| MR-d  | L-rhamnose-binding<br>lectin CSL2-like                  |  |  |  |      |      |      |       |       |  |       |  |  |
| NFY   | Nuclear<br>transcription factor<br>Y subunit alpha-like |  |  |  |      |      |      |       |       |  |       |  |  |
| TAPBP | Tapasin-like                                            |  |  |  |      | 2.23 | 1.70 |       |       |  |       |  |  |
| TfR   | Transferrin receptor<br>1a                              |  |  |  | 2.98 |      |      |       |       |  |       |  |  |
| TUBB  | Tubulin, beta 5                                         |  |  |  |      |      |      |       | -1.33 |  | -1.51 |  |  |

**Supplemental Table 6: Summary of the variations in antimicrobial peptide gene expression between controls and grouper challenged with *Vibrio alginolyticus***

| Unigene  | PREDICTED                                     | 1h | 2h | 3h | 4h     | 5h      | 6h     | 7h      | 8h      | 12h | 16h | 24h | 48h |
|----------|-----------------------------------------------|----|----|----|--------|---------|--------|---------|---------|-----|-----|-----|-----|
| Hepcidin | Hepcidin-like antimicrobial peptide precursor |    |    |    | 141.48 | 1924.44 | 467.00 | 6385.32 | 4798.65 |     |     |     |     |
| LAP2     | Liver-expressed antimicrobial peptide 2-like  |    |    |    |        |         |        |         |         |     |     |     |     |
| Piscidin | Piscidin-like antimicrobial peptide precursor |    |    |    |        |         |        |         | -1.96   |     |     |     |     |
